# Supplementary material
Source: PubMed Central journal article supplement (PMC1913867)

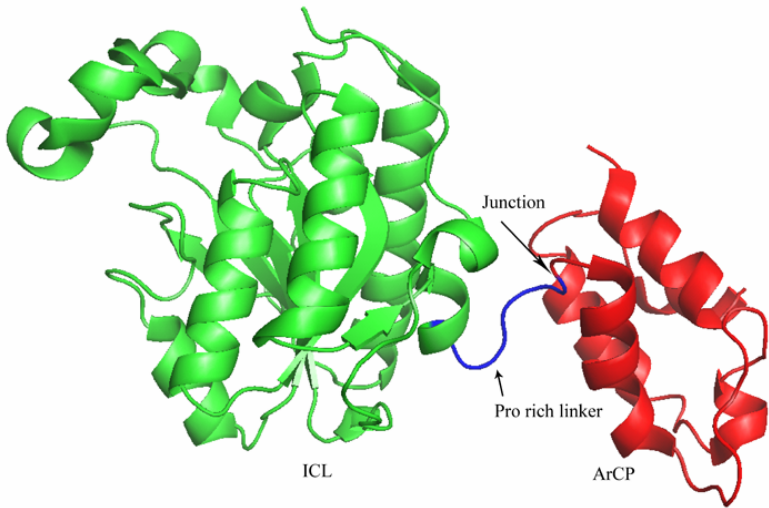

Supplement: pnas_0705122104_1.pdf [file pnas_0705122104_1.pdf]

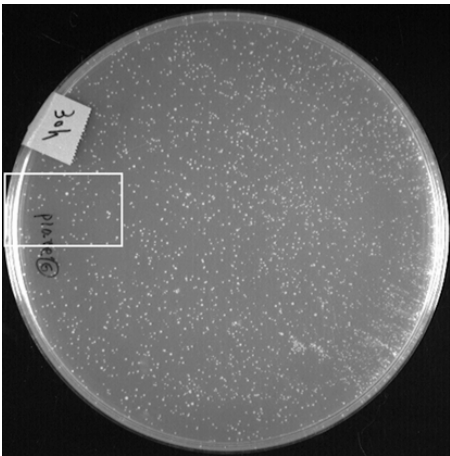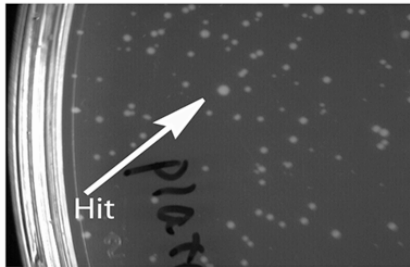

Supplement: pnas_0705122104_2.pdf [file pnas_0705122104_2.pdf]

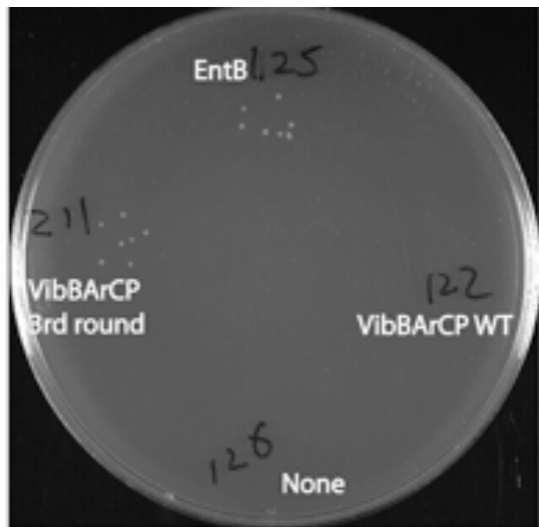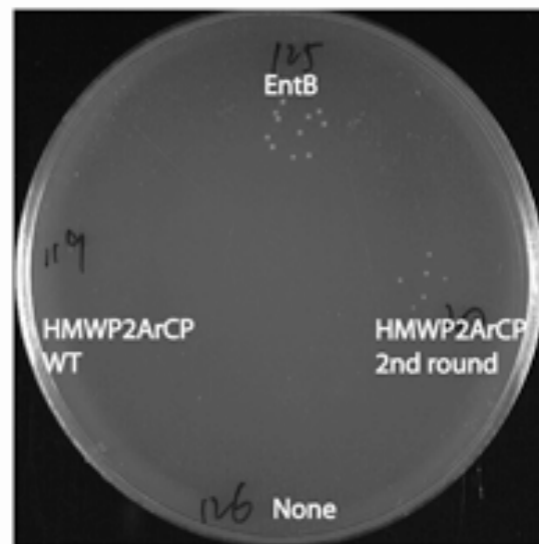

Supplement: pnas_0705122104_4.pdf [file pnas_0705122104_4.pdf]
